# Supplementary material for: Mo-doped ZnO NPs with NIR light enhance peroxidase-like nanozymes and trigger photothermal for bacteria eradication
Source: Royal Society of Chemistry journal article supplement (doi:10.1039/d4tc04313h), 2024-12-27
Supplement: d4tc04313h1.pdf [file d4tc04313h1.pdf]

## Supplementary Material

### Mo-doped ZnO NPs with NIR light enhanced peroxidase-like nanozyme as photocatalytic and antimicrobial applications

Yini Xu <sup>a#</sup>, Jinya Wei <sup>b#</sup>, Dezhi Yang, Yuzhu Song <sup>a\*</sup>, Yaling Yang <sup>a\*</sup>

<sup>a</sup> Faculty of Life Science and Technology, Kunming University of Science and Technology, Kunming 650500, People's Republic of China.

<sup>b</sup> Yunnan High-tech Enterprise Development Promotion Association, Kunming 650021, People's Republic of China.

\*Corresponding author: Yaling Yang, E-mail: 13313116@kust.edu.cn; Yuzhu Song, E-mail: yuzhusong@kust.edu.cn

#### 1. Materials

Sodium molybdate ( $\text{Na}_2\text{MoO}_4 \cdot 7\text{H}_2\text{O}$ ), zinc nitrate ( $\text{ZnNO}_3 \cdot 6\text{H}_2\text{O}$ ), Sodium hydroxide (NaOH), Acetic acid and Sodium acetate were obtained from Tianjin Zhiyuan Reagent Co. Ltd. Hexamethylene tetramine was obtained from Guangzhou Pharmaceuticals Co. Ltd. 3,3',5,5'-Tetramethylbenzidine (TMB) 3,3',5,5'-Tetramethylbenzidine (TMB) were purchased from Tianjin Hiens Biochemical Technology Co., Ltd. Ethanol, hydrogen peroxide ( $\text{H}_2\text{O}_2$ , 30 wt%) was bought from Sigma-Aldrich (Shanghai, China). *Staphylococcus aureus* (*S. aureus*, ATCC-6538), *Escherichia coli* (*E. coli*, ATCC-8099), Ampicillin-resistant *Escherichia coli* (AREC, SHBCC D25148) and Methicillin-resistant *Staphylococcus aureus* (MRSA, ATCC 43300) were received from Shanghai Bioresource Collection Center. All aqueous solutions used in the experiments were prepared with deionized water (18.2 MΩ ·cm, Millipore).

## 2. Characterization

Using a 200 kV accelerating voltage, the TecnaiG2 TF20 transmission electron microscopy (TEM) was used to examine the morphology and microstructure of the Mo/ZnO NPs. Thermo Scientific K-Alpha Nexsa X-ray photoelectron spectroscopy (XPS) fitted with Al X-ray source analysis was used to examine the molecular states of the Mo/ZnO NPs. Additional verification of its composition was conducted using a Bruker Tensor 27 spectrometer that was connected to the Hyperion microscope. The spectrometer had an MCT (HgCdTe) detector that was cooled using liquid nitrogen. Using a Beijing General Analysis Instrument Co. Ltd. TU-1901 Double beam UV-visible spectrophotometer, UV-vis absorption spectra were measured.

### Figures:

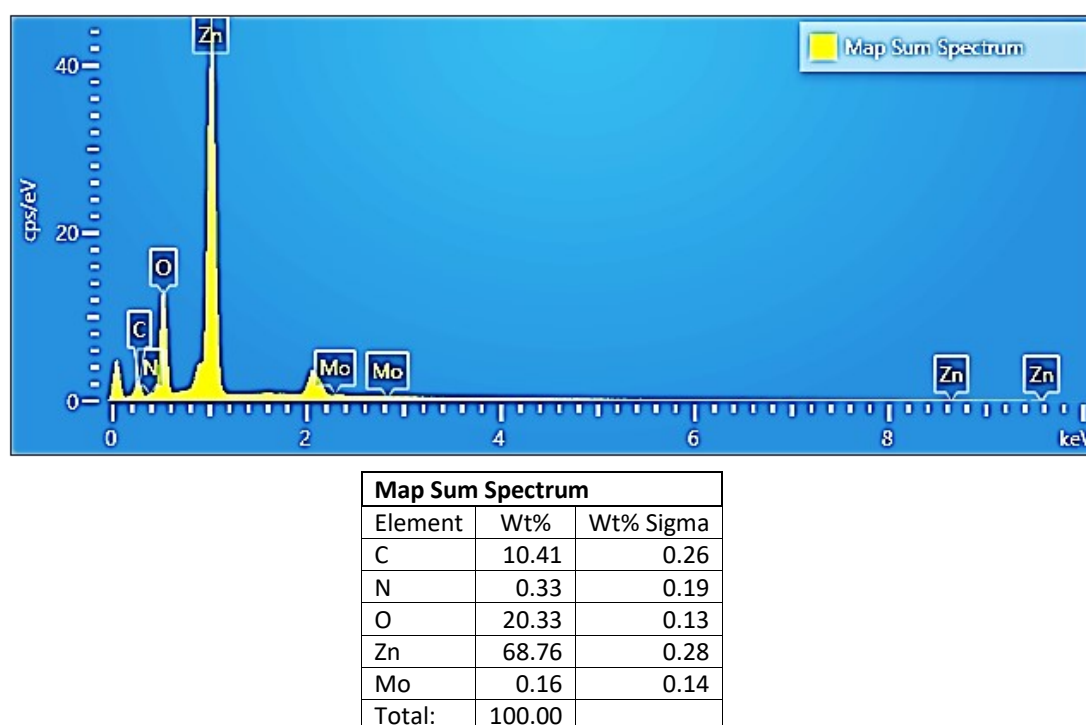

**Fig. S1** The EDS spectrum of the Mo/ZnO NPs microstructures.

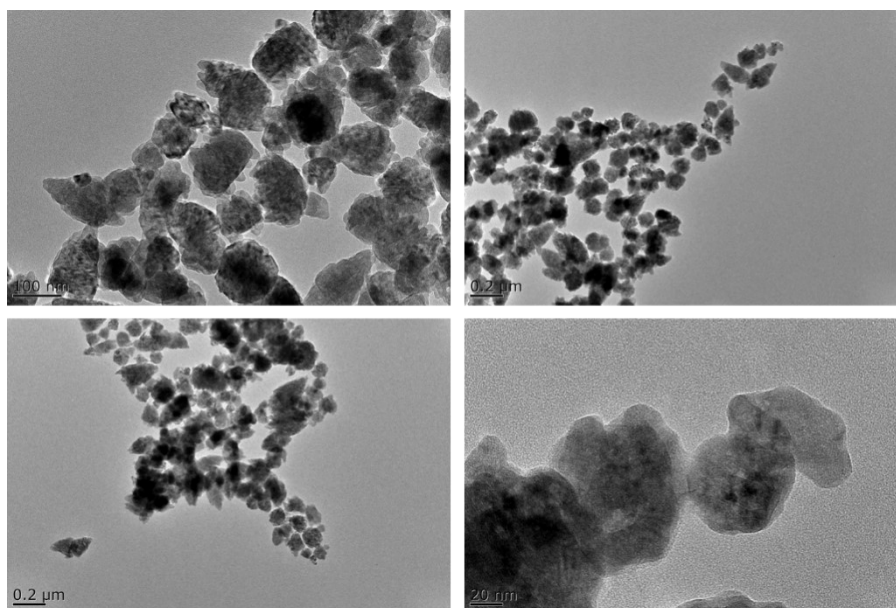

**Fig. S2** TEM image of Mo/ZnO

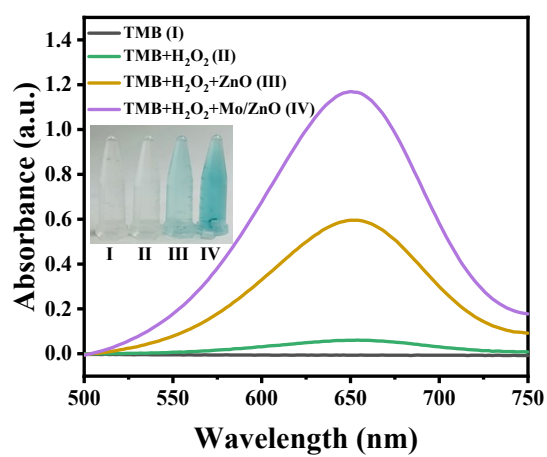

**Fig.S3** Comparison of POD-like activity of ZnO and ZnO@Mo

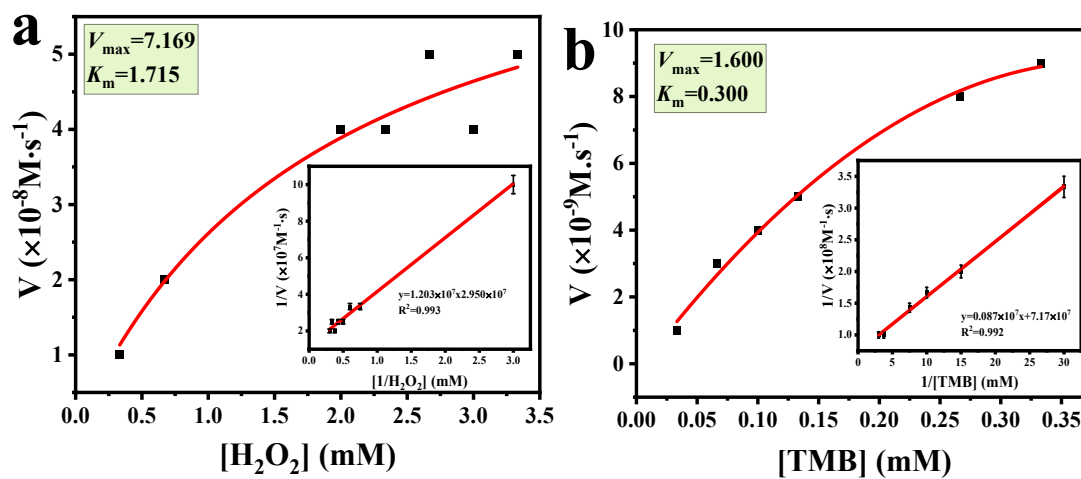

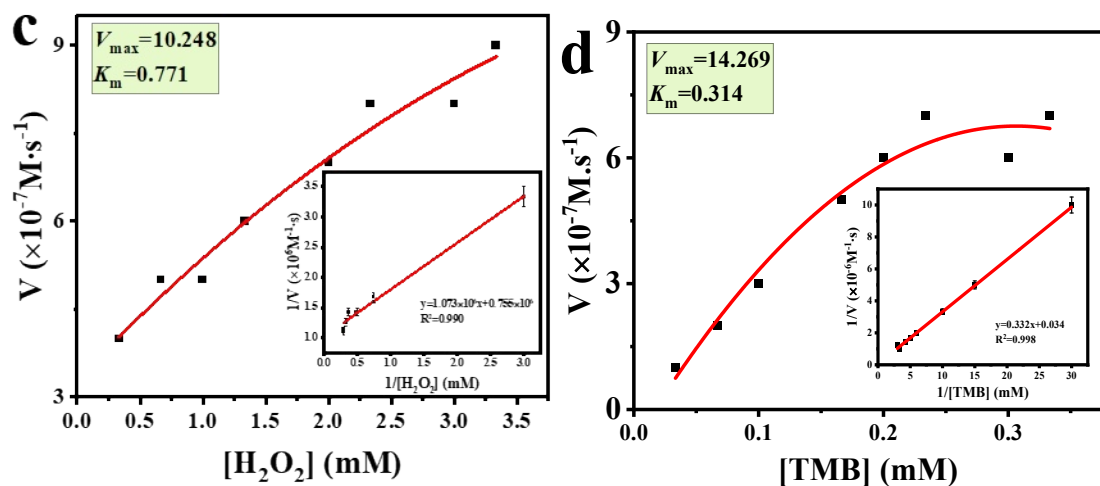

**Fig. S4** Steady-state kinetic analysis of Mo/ZnO NPs (a)  $\text{H}_2\text{O}_2$ , (b) TMB; Mo/ZnO NPs (c)  $\text{H}_2\text{O}_2$ +NIR, (d) TMB+NIR;

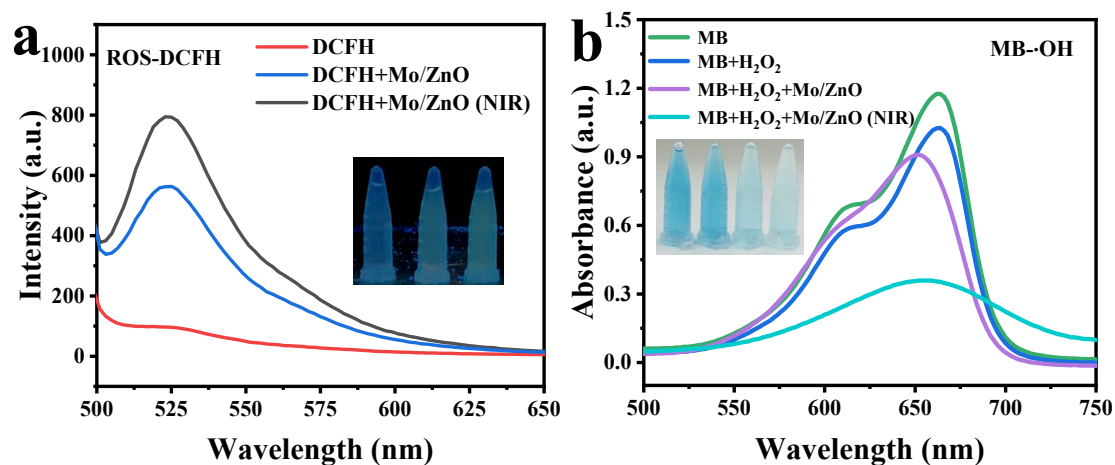

**Fig. S5** (a)The DCFH validation of ROS. (b) The MB validation of  $\cdot\text{OH}$ .

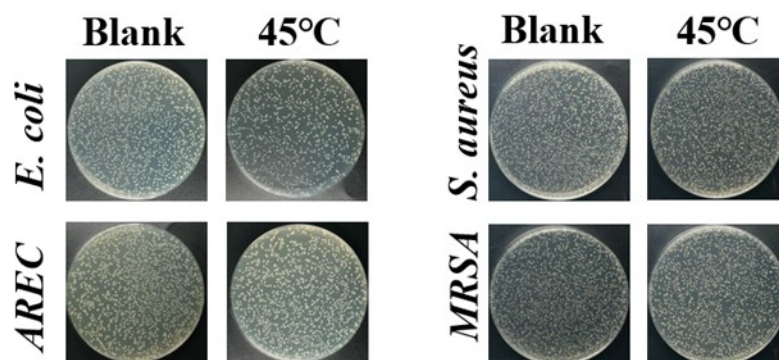

**Fig. S6** The influence of temperature on *E. coli*, AREC, *S. aureus* and MRSA.

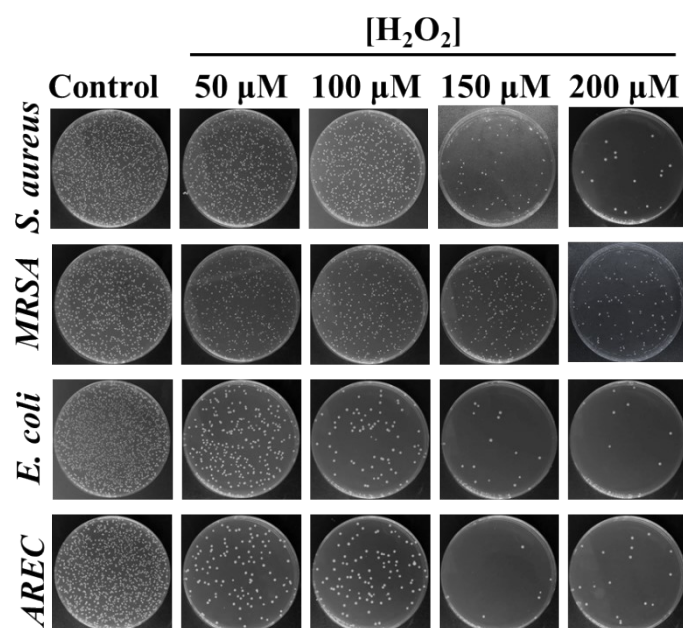

**Fig. S7** The effect of  $H_2O_2$  concentration on the antibacterial activity of Mo/ZnO NPs.

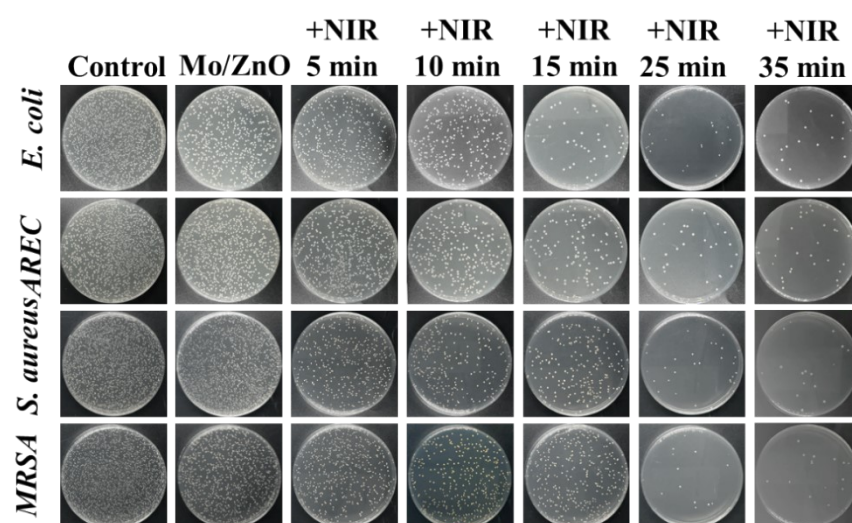

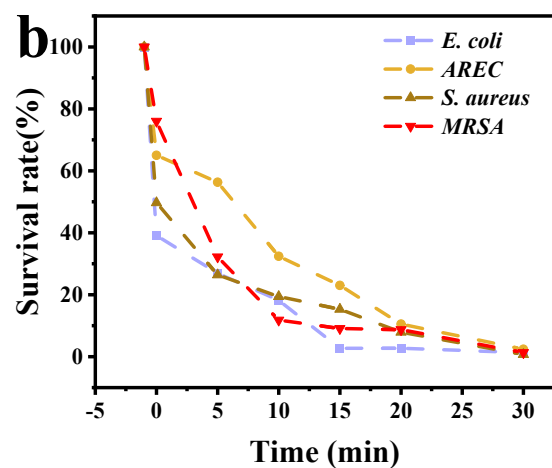

**Fig. S8** The effect of reaction time on the antibacterial activity of Mo/ZnO NPs.

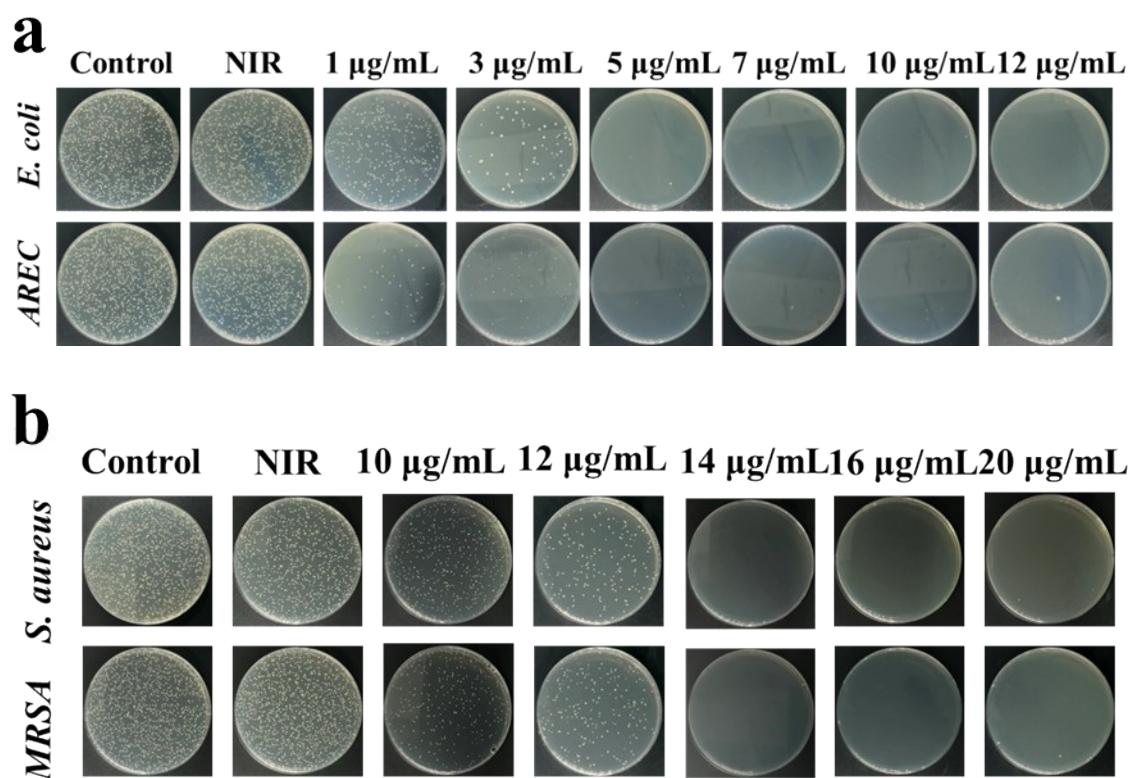



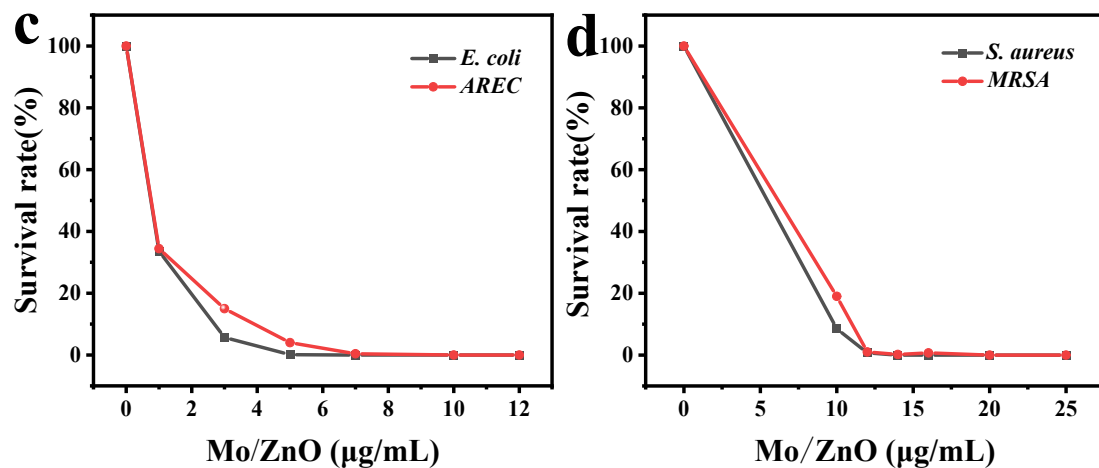

**Fig. S9** Effect of antimicrobial activity of Mo/ZnO NPs concentration.

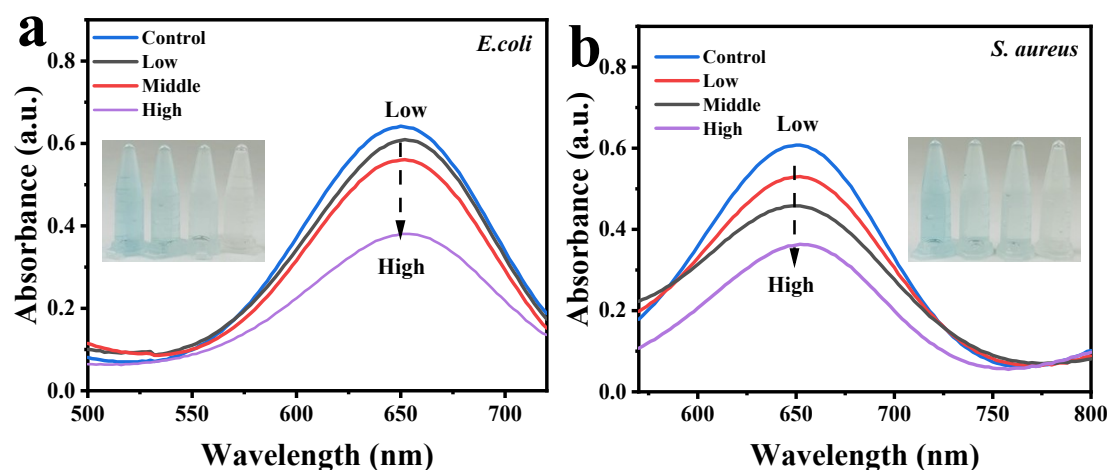

**Fig. S10** ROS generated by Mo/ZnO NPs and the  $H_2O_2$  system are absorbed by bacteria.

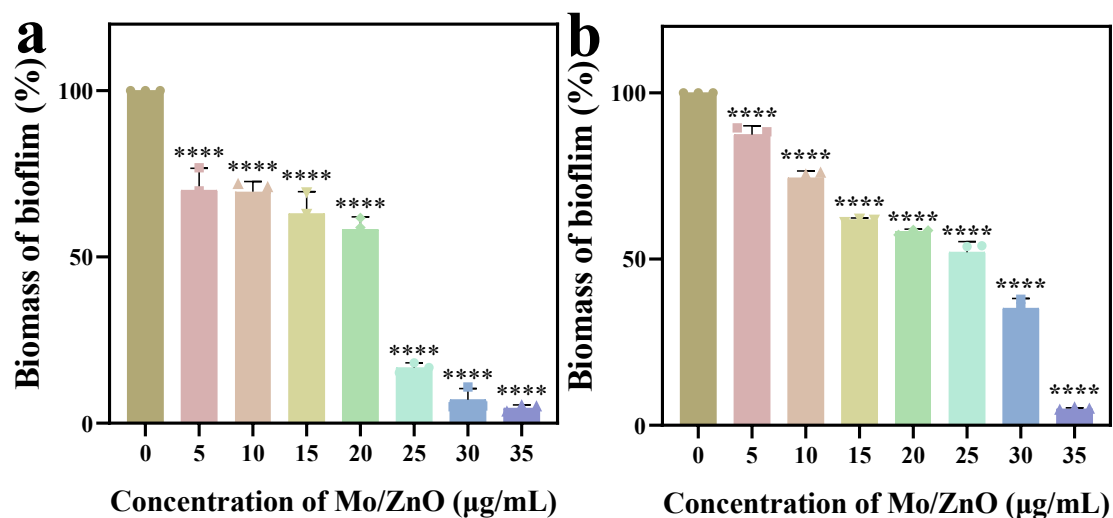

**Fig. S11** Performance of Mo/ZnO NPs in inhibiting biofilm production by AREC,

MRSA.

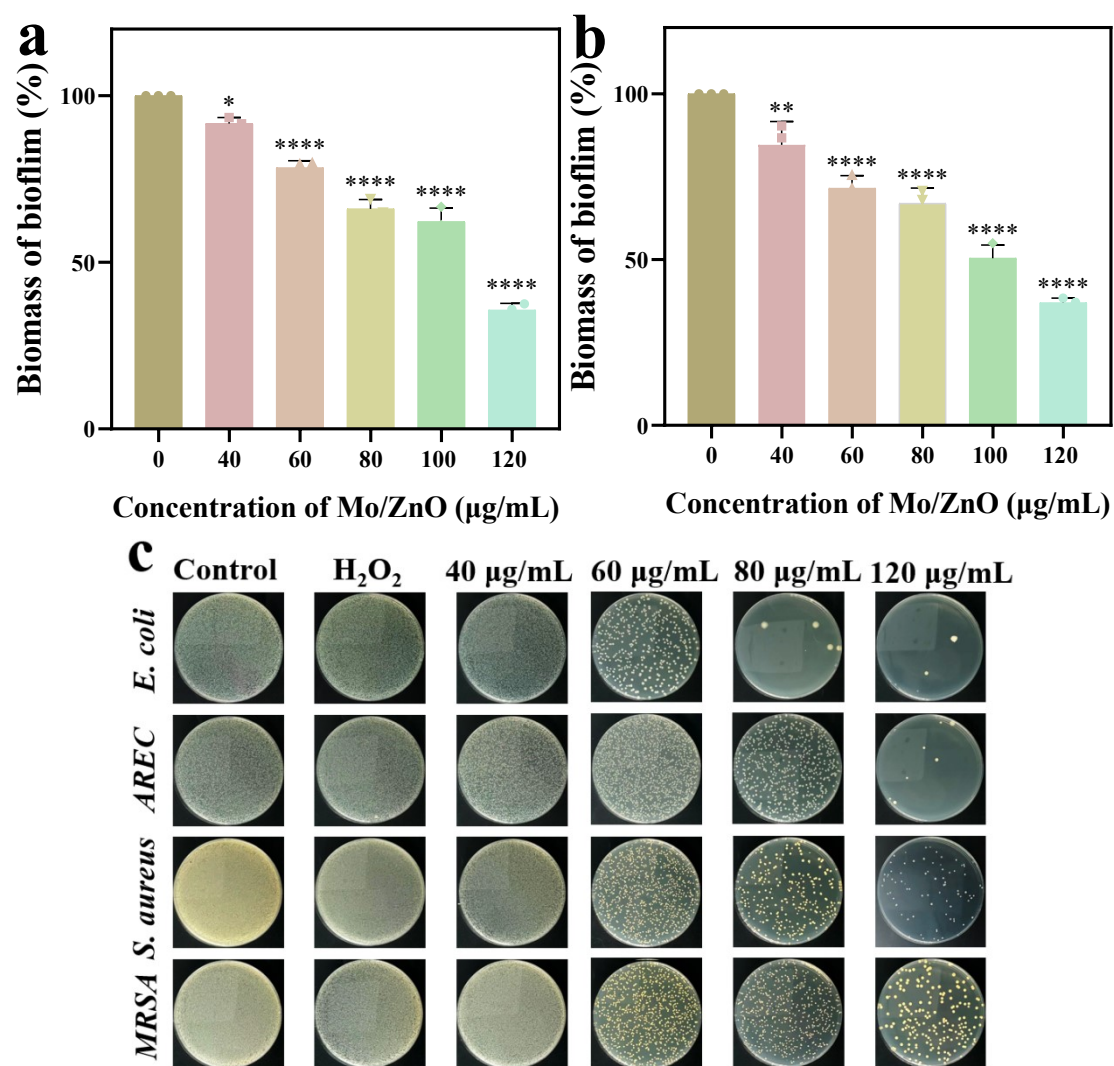

**Fig. S12** (a-b) Performance of Mo/ZnO NPs in eliminating mature biofilms of AREC, MRSA. (c) The formed biofilm was beaten into PBS and mixed well before coating the plate.

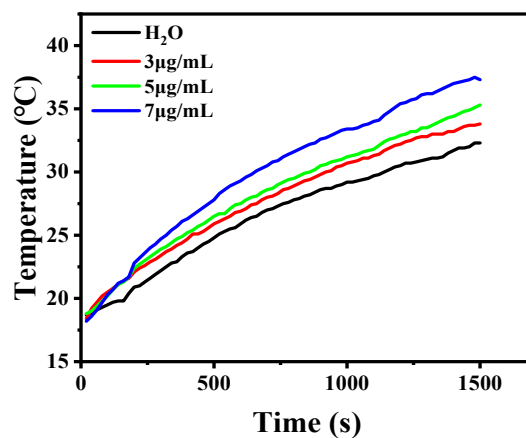



**Fig. S13** Temperature elevation curves of Mo/ZnO NPs at the different concentrations  
irradiated by 808 nm laser
